# Supplementary material
Source: MDPI journal article supplement (https://www.mdpi.com/2079-9292/13/3/498)

**Supplementary Figure S1:** Significant subsets of AI terminologies within the medical domain which are often used interchangeably.

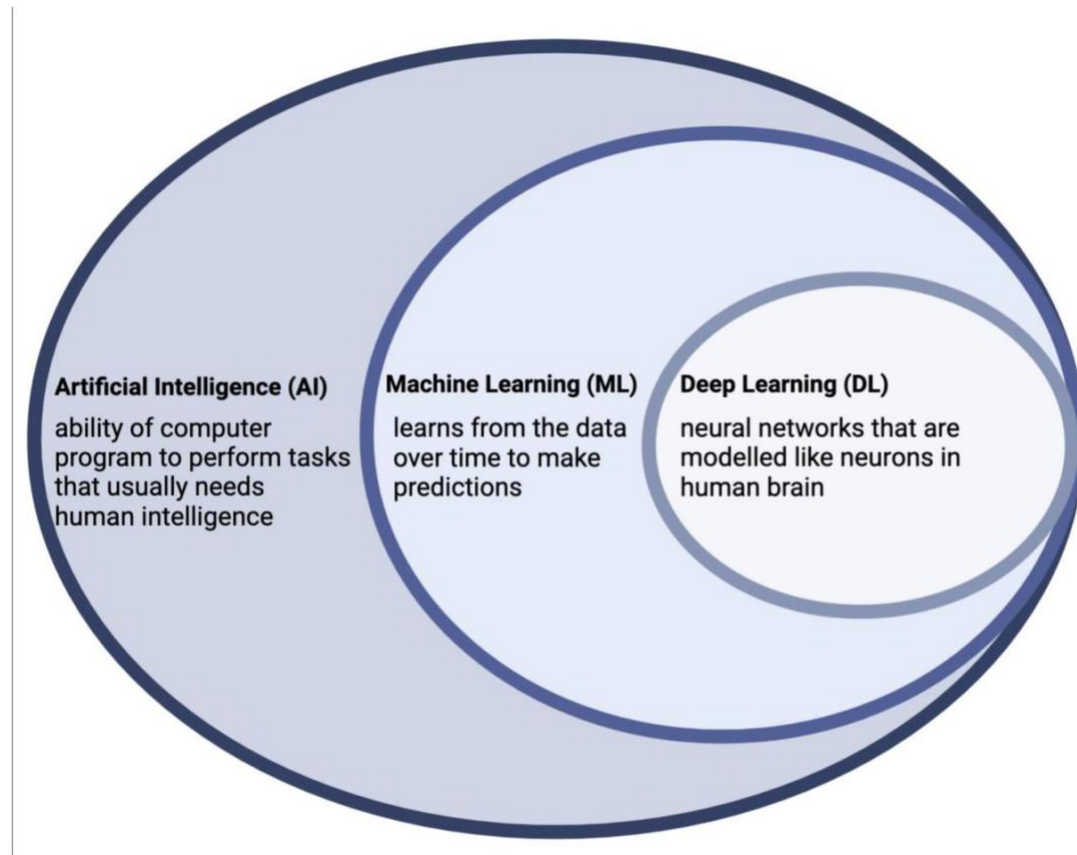

Supplement: s1 [file s1]
