# Supplementary material
Source: MDPI journal article supplement (https://www.mdpi.com/2079-9292/13/3/498)
Supplement: s1 [file s1]

**Supplementary Table S1: FDA approval pathways and sub-pathways for AI/ML-based devices**

| <b>FDA regulatory Description pathway</b> | <b>Description</b>                                                                                                                                                                                                                                                                                                                                                                                                                                                                                                                                                                                                                    |
|-------------------------------------------|---------------------------------------------------------------------------------------------------------------------------------------------------------------------------------------------------------------------------------------------------------------------------------------------------------------------------------------------------------------------------------------------------------------------------------------------------------------------------------------------------------------------------------------------------------------------------------------------------------------------------------------|
| 510(k) pathway                            | <p><b><u>Traditional 510(k):</u></b> depends on demonstration of Substantial Equivalence</p> <p><b><u>Abbreviated 510(k):</u></b> depends on the use of guide documents, controls and recognized standards</p> <p><b><u>Special 510(k):</u></b> when device modifications are made to a manufacturer's own legally marketed device</p>                                                                                                                                                                                                                                                                                                |
| De Novo                                   | <p><b><u>Option 1:</u></b> After obtaining a high-level not substantially equivalent (NSE) determination</p> <p><b><u>Option 2:</u></b> After determining that there is no legally marketed device</p>                                                                                                                                                                                                                                                                                                                                                                                                                                |
| Premarket approval (PMA)                  | <p><b><u>Traditional PMA:</u></b> include application with device description and intended use, nonclinical/clinical studies, case report forms, manufacturing methods, labeling</p> <p><b><u>Modular PMA:</u></b> for medical products in early stages of clinical study</p> <p><b><u>Product Development Protocol:</u></b> for devices that uses well established technology and serves as a contract upon details of design and development activities</p> <p><b><u>Humanitarian Use Device (HUD):</u></b> for device intended to benefit not more than 8,000 patients in the treatment or diagnosis of a disease or condition</p> |

**Supplementary Table S2: Primary product codes and related device classification**

| Primary Product Code | Device Classification Name                                                                    |
|----------------------|-----------------------------------------------------------------------------------------------|
| IYN                  | system, imaging, pulsed doppler, ultrasonic                                                   |
| JAK                  | system, x-ray, tomography, computed                                                           |
| LLZ                  | system, image processing, radiological                                                        |
| LNH                  | system, nuclear magnetic resonance imaging                                                    |
| MUJ                  | system, planning, radiation therapy treatment                                                 |
| QAS                  | radiological computer-assisted triage and notification software                               |
| QDQ                  | radiological computer assisted detection/diagnosis software for lesions suspicious for cancer |
| QFM                  | radiological computer-assisted prioritization software for lesions                            |
| QIH                  | automated radiological image processing software                                              |
| QKB                  | radiological image processing software for radiation therapy                                  |
