# Supplementary material
Source: MDPI journal article supplement (https://www.mdpi.com/2079-9292/13/3/498)
Supplement: s1 [file s1]

Archive with 2 entries (2 files):
- Supplementary_Figure.pdf
- Supplementary_tables.pdf
